# Supplementary material for: Streptomyces sp. MUM256: A Source for Apoptosis Inducing and Cell Cycle-Arresting Bioactive Compounds against Colon Cancer Cells
Source: MDPI journal article supplement (doi:10.3390/cancers11111742), 2019-11-06
Supplement: s1 [file s1]

## Supplemental Materials: *Streptomyces* sp. MUM256: a source for apoptosis inducing and cell cycle arresting bioactive compounds against colon cancer cells

Loh Teng-Hern Tan, Chim-Kei Chan, Kok-Gan Chan, Priyia Pusparajah, Tahir Mehmood Khan, Hooi-Leng Ser, Learn-Han Lee and Bey-Hing Goh

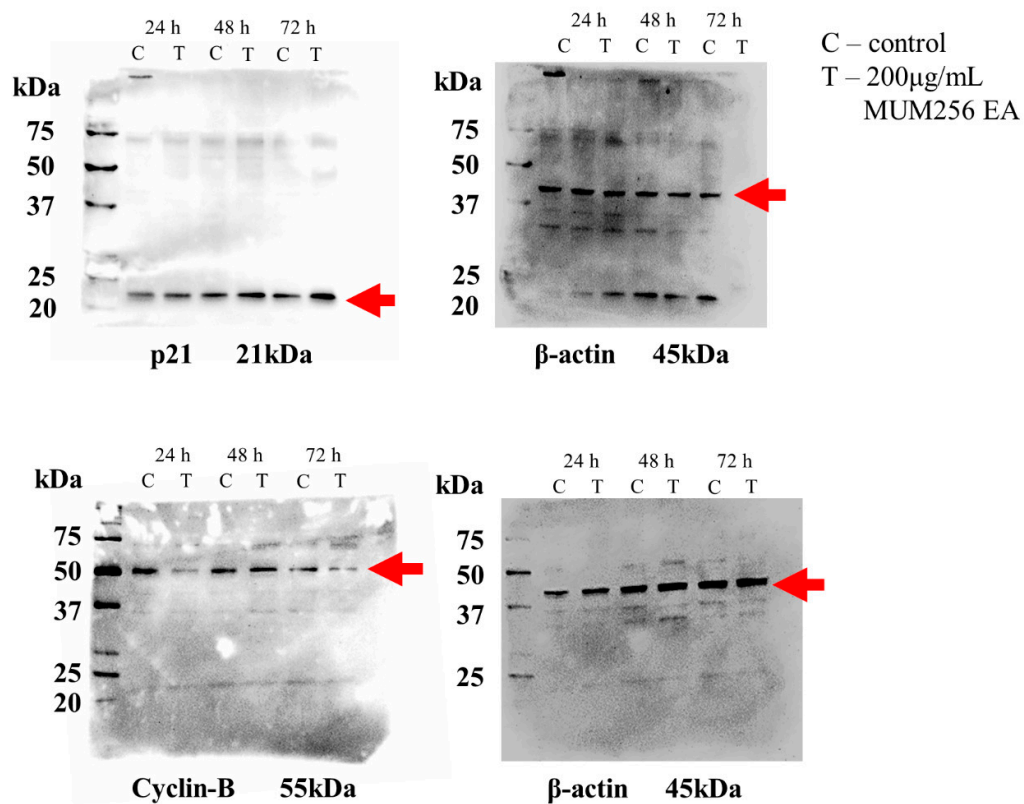

**Figure S1.** The Western blot of protein of interest (p21 and cyclin B) and respective β-actin expressions.

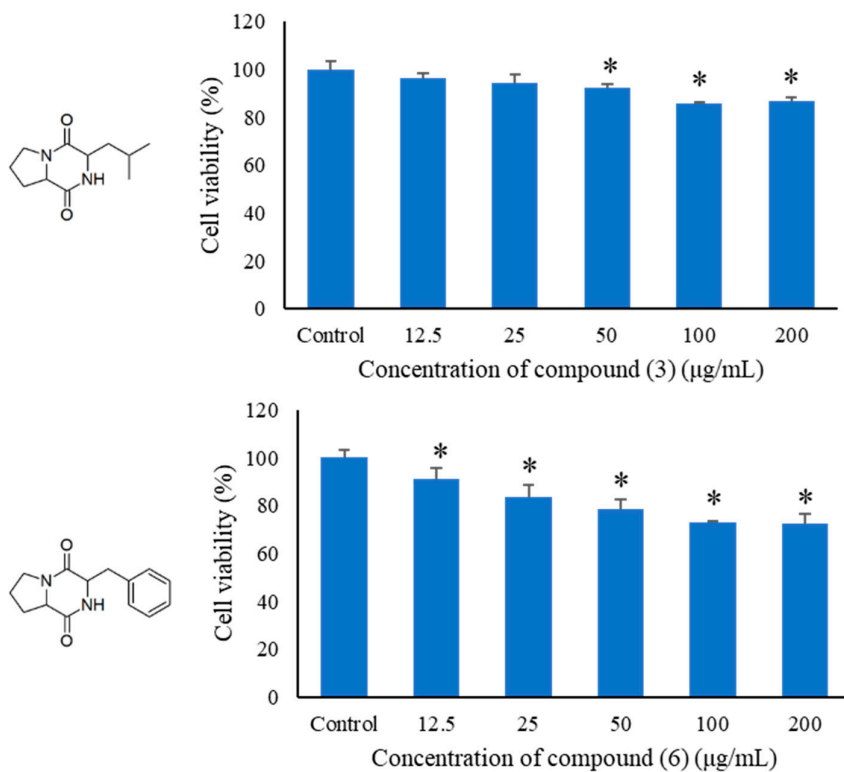

**Figure 2.** Cytotoxic effects of the two main compounds (3) and (6) on HT-29 colon cancer cells. Cytotoxic effect of pyrrolo[1,2-a]pyrazine-1,4-dione, hexahydro-3-(2-methylpropyl)-(3) and pyrrolo[1,2-a]pyrazine-1,4-dione, hexahydro-3-(phenylmethyl)-(6) against HT29 cells at a series of concentrations after 72 hrs treatment, ( $n = 5$ , \*  $p < 0.05$ ).

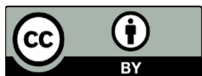

© 2019 by the authors. Licensee MDPI, Basel, Switzerland. This article is an open access article distributed under the terms and conditions of the Creative Commons Attribution (CC BY) license (<http://creativecommons.org/licenses/by/4.0/>).
